# Supplementary material
Source: bioRxiv or medRxiv preprint supplement (https://www.biorxiv.org/highwire/filestream/11670/field_highwire_adjunct_files/6/040386-7.pdf)

**a**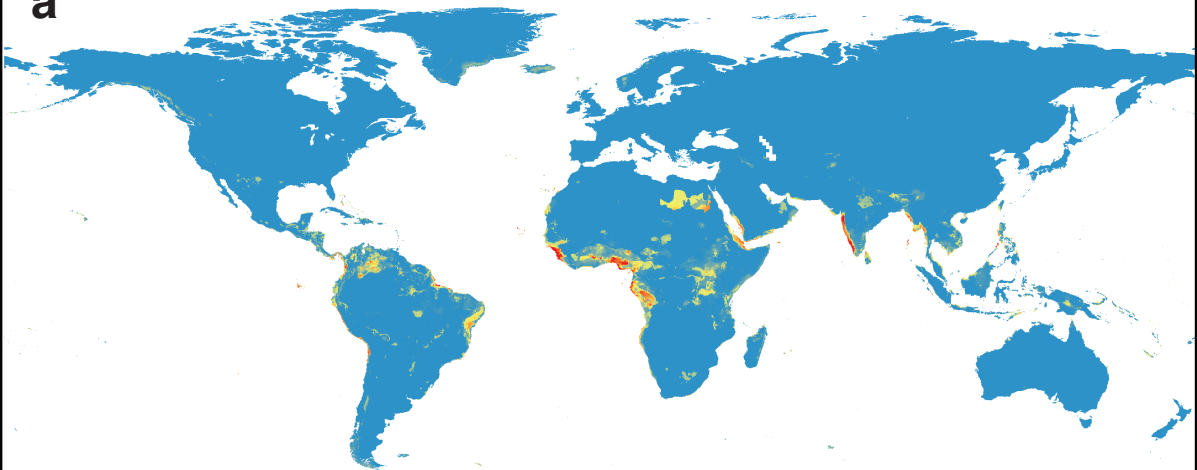**b**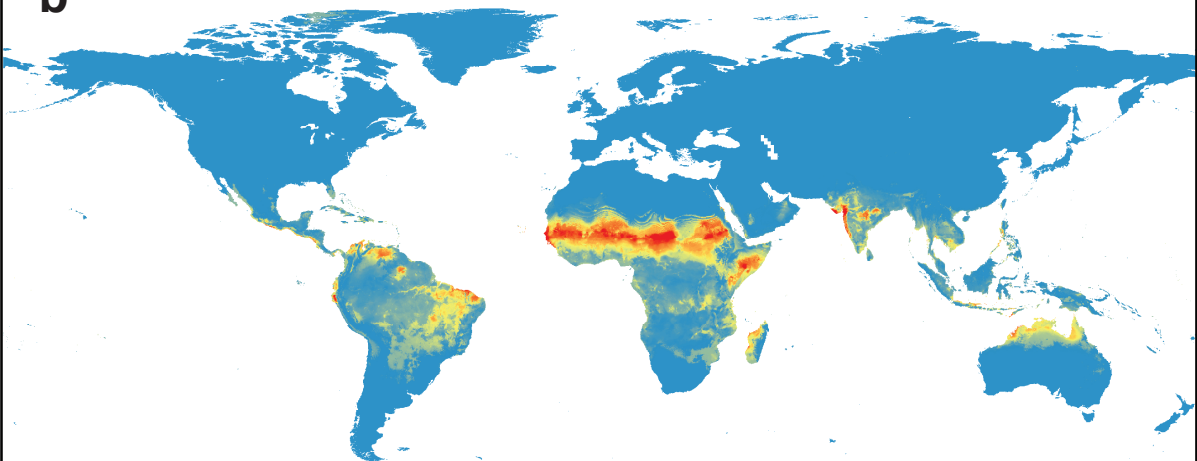

Supplement: Supplementary file [file 040386-7.pdf]
